# Supplementary material
Source: Springer Nature journal article supplement (https://www.springermedizin.de/resource/supplementary/12936_2014_3664_MOESM10_ESM.pdf/9546136)

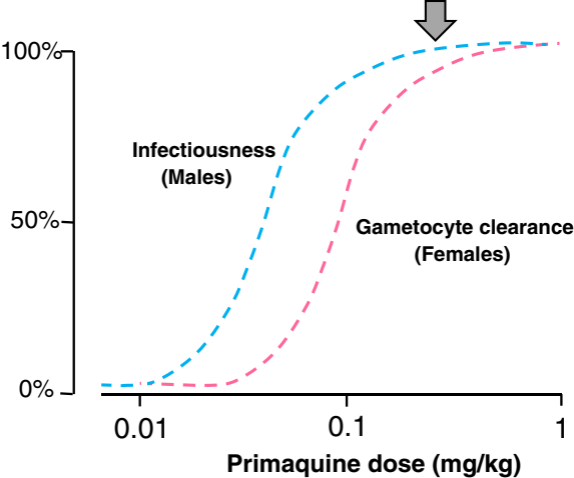

**Infectiousness  
(Males)**

**Gametocyte clearance  
(Females)**

**Primaquine dose (mg/kg)**

Supplement: MOESM10 [file 9546136]
